# Supplementary material for: Comparison of Endoscopic Submucosal Dissection and Radical Surgery for Early Gastric Cancer in Remnant Stomach
Source: MDPI journal article supplement (doi:10.3390/jcm11185403), 2022-09-14
Supplement: s1 [file s1]

**Supplementary table S1 Clinical and pathological outcomes of previous lesion background**

|                                             | ESD (n=48) | Surgery (n=25) |
|---------------------------------------------|------------|----------------|
| Histologic type of previous lesion          |            |                |
| Ulcer                                       | 1          | 6              |
| NA                                          | 14         | 3              |
| Mesenchymoma                                | 1          | 1              |
| Liomyoma                                    | 0          | 1              |
| Differentiated                              | 17         | 5              |
| Undifferentiated                            | 15         | 9              |
| T staging                                   |            |                |
| Inapplicability (Ulcer)                     | 1          | 6              |
| NA                                          | 16         | 9              |
| T1a                                         | 3          | 1              |
| T1b                                         | 8          | 3              |
| T2                                          | 5          | 2              |
| T3                                          | 7          | 3              |
| T4a                                         | 8          | 1              |
| N staging                                   | 47         | 19             |
| Inapplicability (Ulcer)                     |            |                |
| NA                                          | 16         | 9              |
| N0                                          | 20         | 6              |
| N1                                          | 5          | 3              |
| N2                                          | 2          | 0              |
| N3a                                         | 2          | 1              |
| N3b                                         | 2          | 0              |
| TNM staging                                 |            |                |
| Inapplicability (Ulcer)                     | 1          | 6              |
| NA                                          | 16         | 9              |
| IA                                          | 6          | 1              |
| IB                                          | 5          | 3              |
| IIA                                         | 8          | 4              |
| IIB                                         | 3          | 1              |
| IIIA                                        | 4          | 0              |
| IIIB                                        | 3          | 1              |
| IIIC                                        | 2          | 0              |
| Additional treatment after previous surgery | 33         | 14             |
| Chemotherapy                                | 25         | 12             |
| Radiotherapy                                | 8          | 2              |

NA, Not available

**Supplementary table S2 Comparison of T staging in previous lesion background between the dead and the living**

|       | Inapplicability (Ulcer) | NA | T1a | T1b | T2 | T3 | T4a | Total |
|-------|-------------------------|----|-----|-----|----|----|-----|-------|
| Dead  | 2                       | 6  | 0   | 1   | 0  | 0  | 3   | 12    |
| Alive | 5                       | 19 | 4   | 10  | 7  | 10 | 6   | 61    |
| Total | 7                       | 25 | 4   | 11  | 7  | 10 | 9   | 73    |

NA, Not available

**Supplementary table S3 Comparison of N staging in previous lesion background between the dead and the living**

|       | Inapplicability (Ulcer) | NA | N0 | N1 | N2 | N3a | N3b | Total |
|-------|-------------------------|----|----|----|----|-----|-----|-------|
| Dead  | 2                       | 6  | 1  | 0  | 1  | 0   | 2   | 12    |
| Alive | 5                       | 19 | 25 | 8  | 1  | 3   | 0   | 61    |
| Total | 7                       | 25 | 26 | 8  | 2  | 3   | 2   | 73    |

NA, Not available

**Supplementary table S4 Comparison of TNM staging in previous lesion background between the dead and the living**

|       | Inapplicability (Ulcer) | NA | IA | IB | IIA | IIB | IIIA | IIIB | IIIC | Total |
|-------|-------------------------|----|----|----|-----|-----|------|------|------|-------|
| Dead  | 2                       | 6  | 0  | 1  | 0   | 0   | 1    | 0    | 2    | 12    |
| Alive | 5                       | 19 | 7  | 7  | 12  | 4   | 3    | 4    | 0    | 61    |
| Total | 7                       | 25 | 7  | 8  | 12  | 4   | 4    | 4    | 2    | 73    |

NA, Not available
